# Supplementary material
Source: PubMed Central journal article supplement (PMC4205181)

*Olig2:GFP*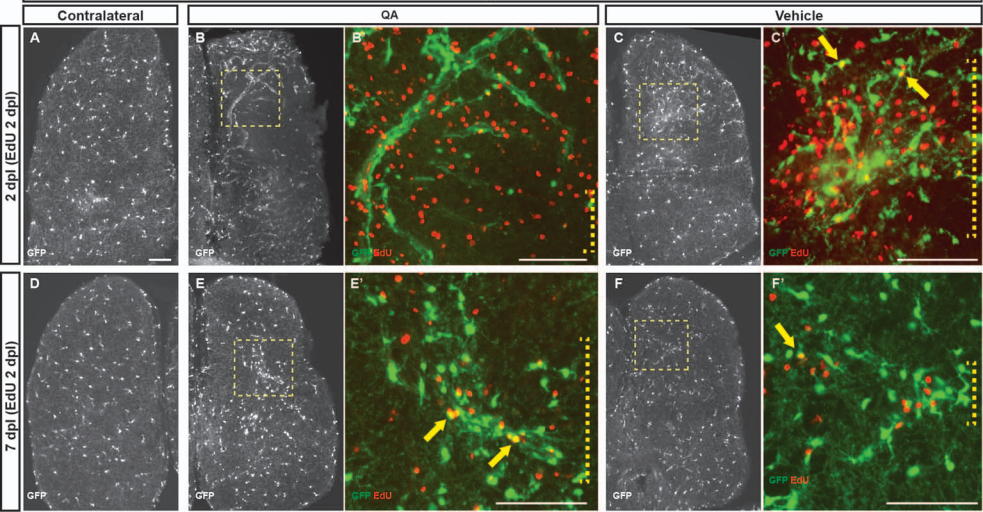

*1016tuba1a:GFP*

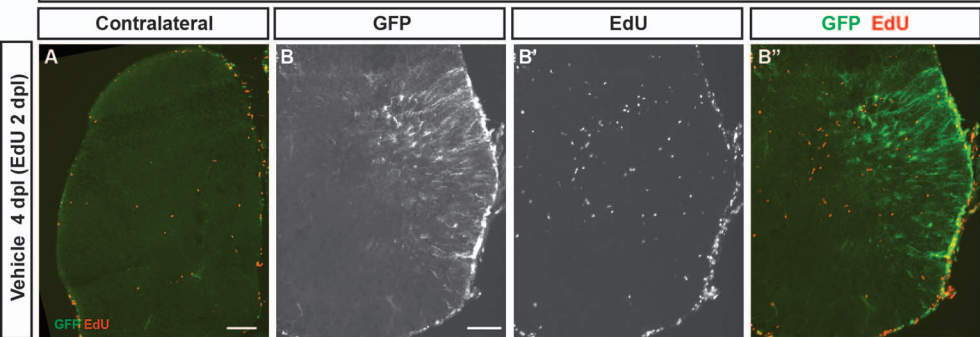

*ascl1a:GFP*

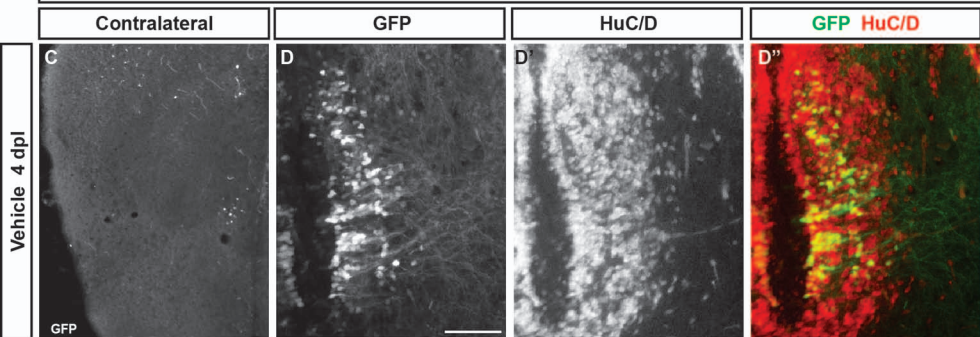

*her4:CreER<sup>T2</sup>;βactin2:LCLG* - GFP labeling

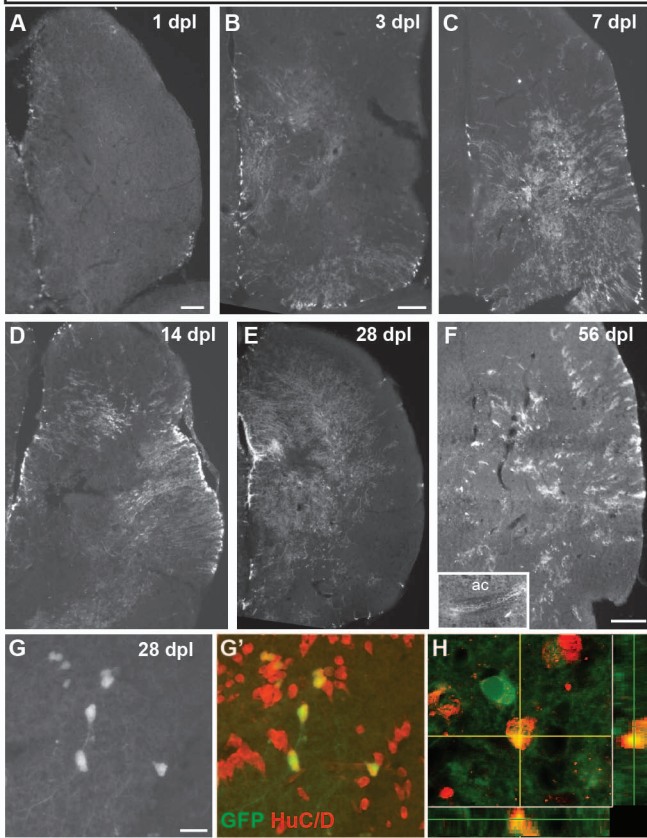

Supplement: NIHMS612126-supplement-Supp_FigureS1-S3.pdf [file NIHMS612126-supplement-Supp_FigureS1-S3.pdf]
